# Supplementary material
Source: publisher figshare collection journal article supplement (https://frontiersin.figshare.com/ndownloader/files/28838049)
Supplement: Supplementary file [file 28838049]

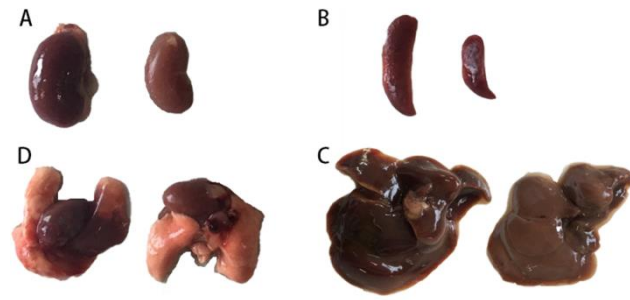

**Fig. S6.** The organs necropsy of mouse. The organs necropsy of challenged mouse (left) and control mouse (right). Compared with control organs, (A) kidneys and (B) spleens of challenged mouse were swelling and congestion, (C) lungs and (D) livers had bleeding.
